# Supplementary material for: Nanoporous nitrogen-doped graphitic carbon hollow spheres with enhanced electrochemical properties
Source: Royal Society of Chemistry journal article supplement (doi:10.1039/d1qm01045j), 2021-01-01
Supplement: d1qm01045j1.pdf [file d1qm01045j1.pdf]

# **Nanoporous Nitrogen-Doped Graphitic Carbon Hollow Sphere with Enhanced Electrochemical Properties**

Partha Bairi<sup>1</sup>, Kausik Sardar, Madhupriya Samanta<sup>2,3</sup>, Kausik Chanda<sup>1</sup>, Kalyan Kumar Chattopadhyay<sup>1\*</sup>

<sup>1</sup>Department of Physics, Jadavpur University, Kolkata 700032, India

<sup>2</sup>School of Materials Science and Nanotechnology, Jadavpur University, Kolkata 700032, India

<sup>3</sup>Department of Electronics and Telecommunication Engineering, Jadavpur University, Kolkata 700032, India

Email: [kalyan\\_chattopadhyay@yahoo.com](mailto:kalyan_chattopadhyay@yahoo.com)

**Table content:**

|                                                                                  |     |
|----------------------------------------------------------------------------------|-----|
| 1. Experimental .....                                                            | S2  |
| 2. Table of summarized BET results.....                                          | S5  |
| 3. Table of compared % of various doped-nitrogen and surface area .....          | S6  |
| 4. Table of summarized ORR results.....                                          | S7  |
| 5. Table of compared ORR data of various nitrogen-doped carbon and CPNMA s ..... | S8  |
| 6. Table of compared capacitance of CPNMA samples .....                          | S9  |
| 7. SEM images of PNMA .....                                                      | S10 |
| 8. SEM images of CPNMA-900 and CPNMA-800.....                                    | S11 |
| 9. Nitrogen adsorption-desorption curve .....                                    | S12 |
| 10. XPS survey spectra .....                                                     | S13 |
| 11. Percentage of graphitic nitrogen vs carbonization temperature plot .....     | S14 |
| 12. O 1s XPS core level spectra.....                                             | S15 |
| 13. K-L plot of CPNMA-900 and CPNMA-800 .....                                    | S16 |
| 14. References.....                                                              | S17 |

## 1. Experimental Section:

**Synthesis of PNMA and CPNMA:** The nanostructured poly N-methylaniline (PNMA) was synthesized using the interfacial polymerization technique described in the literature.<sup>15</sup> The monomer N-methylaniline (0.4 mol) was dissolved in 100 mL water containing 1.0 g of poly (methyl vinyl ether-alt-maleic acid) by vigorous handshaking then cool it to 2 to 5 °C. After that, 0.6 molar 100 ml aqueous solution of pre-cooled ammonium persulfate was added slowly to the monomer solution under magnetic stirring condition and reaction still continued for another 30 min. In the course of the reaction, the temperature was kept at 0-5 °C using an ice bath. Then the reaction mixture was kept in a refrigerator for about 24 h for completion of the reaction. Then the final precipitated PNMA was separated using a centrifuge and washed with a large amount of water and finally using ethanol. To obtain the CPNMA materials we have carbonized as-synthesized solid dry PNMA using a tube furnace at different temperatures such as 800, 900, and 1000 °C under N<sub>2</sub> gas flow atmosphere. The 5°C/min. temperature ramp was used to reach the targeted carbonization temperature and then kept another 2 h at final temperature.

**Characterization:** All the FE-SEM images were taken using a Zeiss Sigma FE-SEM operating at an accelerating voltage of 5 kV. Prior to the capture of the FE-SEM images, all the carbon samples and polymer were dispersed in ethanol then drop casted on the cleaned silicon substrate and dried at 60 °C. All the dried samples were then coated with platinum (~ 2 nm) by sputtering a Hitachi S-2030 ion coater. TEM and HR-TEM images of the CPNMA-1000 sample were taken using JEOL JEM-2100 operated at 200 kV. The CPNMA-1000 sample was dispersed in ethanol by bath sonication then drop cast on a standard carbon-coated copper grid and dried at 60 °C. Powder XRD and Raman spectra of all the solid CPNMA samples were taken at room temperature using a MiniFlex 600, Rigaku, with Cu-K $\alpha$  radiation and WITec alpha 300RA Raman Confocal Microscope with 532 nm diode laser respectively. The XPS data of all the CPNMA samples were obtained using SPECS HSA3500 hemispherical analyzer with a monochromatic Al-K $\alpha$  x-ray source. The nitrogen gas adsorption–desorption isotherms of CPNMA-1000, CPNMA-900, and CPNMA-800 together with PNMA were measured using Quantachrome Nova1000e Instrument at liquid nitrogen temperature 77.35 K. All cyclic voltammetry and chronopotentiometry data were collected using Gamry interface 1000 electrochemical analyzer within the potential range from 0 to -1.0 V (vs. Ag/AgCl) in 2 M KOH electrolyte solution. All CPNMA modified electrodes were prepared by casting a slurry of CPNMA samples on the cleaned Nickel foam. The high viscous

slurry was prepared by dispersing 8 mg CPNMA and 1.0 mg PVDF in 350  $\mu\text{l}$  water–isopropanol (3: 1) solvent containing 50  $\mu\text{l}$  nafion (5 %). All the oxygen reduction reaction experiments were conducted using the Autolab instrument model number PGSTAT-M204. Prior to each measurement, 0.1 M KOH electrolyte was saturated with oxygen. The rotating disk electrode (RDE) was modified using an ink which consists of CPNMA samples. The ink was prepared by taking 5  $\mu\text{L}$  nafion solution (5 %) and CPNMA in a 95 mL water-ethanol (3:1) mixture and applied 1 h bath sonication

The kinetics of the ORR can be described by using Koutecky-Levich (K-L) equation 1 below.

$$\frac{1}{J} = \frac{1}{J_K} + \frac{1}{J_L} = \frac{1}{B\omega^{0.5}} + \frac{1}{J_K} \dots\dots\dots 1$$

$$B = 0.62nFC_0 (D_0)^{2/3}\nu^{-1/6} \dots\dots\dots 2$$

$$J_K = nFKC_0 \dots\dots\dots 3$$

Where J,  $J_K$  and  $J_L$  are the measure current density, the kinetic and diffusion-limiting current density of the electrode. The angular velocity of the disk is  $\omega$  ( $\omega = 2\pi N$ , N is the linear rotation speed), n is the number of electrons transferred in oxygen reduction at the cathode, F is the Faraday constant ( $F = 96485 \text{ C mol}^{-1}$ ),  $C_0$  is the bulk concentration of oxygen ( $C_0 = 1.2 \times 10^{-3} \text{ mol L}^{-1}$ ),  $\nu$  is the kinematic viscosity of the electrolyte ( $\nu = 0.1 \text{ m}^2 \text{ s}^{-1}$ ), diffusion coefficient  $D_0$  ( $1.9 \times 10^{-5} \text{ cm s}^{-1}$ ), and K is the electron transfer rate constant. All the parameters are valid when we have performed ORR in 0.1 M KOH as an electrolyte.

**2. Table S1:** Nitrogen adsorption-desorption results of all the CPNMA samples

| Sample     | Total BET surface area (m <sup>2</sup> g <sup>-1</sup> ) | Micropore surface area (m <sup>2</sup> g <sup>-1</sup> ) | Average pore diameter (nm) | Total pore volume (ccg <sup>-1</sup> ) | Micro pore volume (ccg <sup>-1</sup> ) |
|------------|----------------------------------------------------------|----------------------------------------------------------|----------------------------|----------------------------------------|----------------------------------------|
| CPNMA-800  | 15.4                                                     | 0                                                        | 6.6                        | 0.003                                  | 0                                      |
| CPNMA- 900 | 227.4                                                    | 192.5                                                    | 2.4                        | 0.14                                   | 0.1                                    |
| CPNMA-1000 | 545.1                                                    | 498.4                                                    | 2.3                        | 0.31                                   | 0.27                                   |

**3. Table S2:** Various nitrogen doped carbon synthesis and comparison their specific surface area and total atomic percentage of doped-nitrogen

| Carbons          | Precursor                                | Carbonization temperature °C | Total BET surface area m <sup>2</sup> g <sup>-1</sup> | Total atomic % of Nitrogen | References |
|------------------|------------------------------------------|------------------------------|-------------------------------------------------------|----------------------------|------------|
| N,F-Carbon-1000  | Polytetrafluoroethylene/ polyaniline     | 1000                         | 838                                                   | 1.74%                      | S1         |
| NC-900           | Polypyrrole and KOH activation           | 900                          | 1450                                                  | 2.8                        | S2         |
| PNCNT            | Polypyrrole and KOH activation           | 650                          | 1765                                                  | 4.36                       | S3         |
| PNHCS            | polyaniline                              | 600                          | 213                                                   | 6.7                        | S4         |
| CT               | polyaniline                              | 500                          | 312                                                   | 1.2                        | S5         |
| PDMC-900         | polyaniline                              | 900                          | -                                                     | 4.39                       | S6         |
| CX1000           | Polypyrrole (silica xerogel as template) | 1000                         | 1480                                                  | 3.55                       | S7         |
| NCNFs            | polypyrrole + polyacrylonitrile          | 900                          | 34.5                                                  | 12.53                      | S8         |
| G-CBP-a          | polyaniline + Amine functionalized GO    | 1000                         | 362.9                                                 | 5.3                        | S9         |
| C-PANI           | polyaniline                              | 800                          | 322                                                   | 5.8                        | S10        |
| MEP-NC850        | polyaniline                              | 850                          | 1341.12                                               | 4.26                       | S11        |
| NCM-700          | poly(1,5-diaminonaphthalene)             | 700                          | 403                                                   | 5.94                       | S12        |
| Hollow PANI      | polyaniline                              | 800                          | -                                                     | 4.03                       | S13        |
| N-CNTs(1000)-1.5 | Polyaniline halloysite-template          | 1000                         | 261                                                   | 4.87                       | S14        |
| CTS-4-700        | Carbazole-terephthalaldehyde             | 700                          | 1226                                                  | 2.5                        | S15        |
| CPNMA-800        | poly(N-methylaniline)                    | 800                          | 15.4                                                  | 8.94                       | This Work  |
| CPNMA-900        | poly(N-methylaniline)                    | 900                          | 227.4                                                 | 4.82                       | This Work  |
| CPNMA-1000       | poly(N-methylaniline)                    | 1000                         | 545.1                                                 | 3.53                       | This Work  |

**4. Table S3:** ORR results of all the CPNMA samples obtained from LSV data taken using RDE at a rotating speed of 1600 rpm

| Samples    | Onset potential | $E_{0.5}$ | Limiting current density | Number of electron transfer | Tafel slope mV/Decade |
|------------|-----------------|-----------|--------------------------|-----------------------------|-----------------------|
| CPNMA-1000 | 0.87            | 0.73      | -3.32                    | 2.53                        | 67.1                  |
| CPNMA-900  | 0.85            | 0.69      | -2.68                    | 2.58                        | 55.9                  |
| CPNMA-800  | 0.80            | 0.65      | -3.41                    | 3.4                         | 58.1                  |

**5. Table S4:** Various nitrogen-doped carbon and comparison their specific ORR activity

| Samples       | Onset potential (V) | $E_{0.5}$ | Cathodic peak potential (V) | Reference |
|---------------|---------------------|-----------|-----------------------------|-----------|
| Co-P,N-CNT    | 0.916               | 0.803     | 0.798                       | S16       |
| 2D-hBN/RGO    | 0.798               | -         | -                           | S17       |
| N-CNTs(900)-1 | -                   | 0.769     | 0.74                        | S18       |
| N-,O-,S-OMCs  | 0.96                | 0.74      | 0.75                        | S19       |
| PDMC-800      | 0.71                | -         | 0.94 V                      | S20       |
| NHPC1:3-900   | 0.87                | 0.73      | 0.82                        | S21       |
| Carbon-L      | 0.86                | 0.7       | 0.73                        | S22.      |
| NGSH          | 0.88                | 0.7       | -0.3                        | S23       |
| NCNC          | 0.87                | 0.78      | -                           | S24       |
| CPNMA-1000    | 0.87                | 0.73      | 0.72                        | This work |
| CPNMA-900     | 0.85                | 0.69      | 0.64                        | This work |
| CPNMA-800     | 0.80                | 0.65      | 0.66                        | This work |



**6. Table S5:** Various carbon materials and comparison their specific capacitance

| Carbon Materials                  | Specific capacitance (Fg <sup>-1</sup> ) | Scan rate/Current density | Electrolyte                            | Reference |
|-----------------------------------|------------------------------------------|---------------------------|----------------------------------------|-----------|
| PNHCS (N-doped carbon)            | 213                                      | 0.5 A g <sup>-1</sup>     | 6 M KOH                                | 45        |
| NHCNs-750 (N-doped carbon)        | 210.1                                    | 5 mV s <sup>-1</sup>      | 6 M KOH                                | 46        |
| HPCT-4 (N-doped carbon)           | 365.9                                    | 0.1 A g <sup>-1</sup>     | 6 M KOH                                | 47        |
| NDC (N-doped carbon)              | 187.1                                    | 1 A g <sup>-1</sup>       | 1 M H <sub>2</sub> SO <sub>4</sub>     | 48        |
| NC-900 (N-doped carbon)           | 190                                      | 2 mV s <sup>-1</sup>      | 1.5 M MeEt3NBF4/PC                     | 49        |
| CNFs@polypyrrole (N-doped carbon) | 202                                      | 1 A g <sup>-1</sup>       | 6 M KOH                                | 50        |
| N-CS (N-doped carbon)             | 191.9                                    | 0.1 A g <sup>-1</sup>     | 1 M H <sub>2</sub> SO <sub>4</sub>     | 51        |
| Zn-TA-40%-90                      | 271                                      | 0.2 A g <sup>-1</sup>     | 6 M KOH                                | 52        |
| Boron-doped carbon                | 0.26                                     | 2 mVs <sup>-1</sup>       | 6 M KOH                                | 53        |
|                                   | 228                                      | 1 mVs <sup>-1</sup>       | 1 M H <sub>2</sub> SO <sub>4</sub>     | 54        |
| Graphene aerogel                  | 175                                      | 10 mVs <sup>-1</sup>      | 5 M KOH                                | 55        |
|                                   | 128                                      | 50 mA g <sup>-1</sup>     | 6 M KOH                                | 56        |
| Carbon nanotube                   | 180                                      | -                         | 7.5 N KOH                              | 57        |
|                                   | 102                                      | 100 Hz                    | 38 wt % H <sub>2</sub> SO <sub>4</sub> | 58        |
| Activated carbon                  | 292.2                                    | 5 mVs <sup>-1</sup>       | 1 M H <sub>2</sub> SO <sub>4</sub>     | 59        |
|                                   | 261.3                                    | 1 A g <sup>-1</sup>       |                                        |           |
| Mesoporous fullerene crystals     | 172                                      | 0.5 A g <sup>-1</sup>     | 6 M KOH                                | 60        |
|                                   | 141                                      | 0.5 A g <sup>-1</sup>     | Na <sub>2</sub> SO <sub>4</sub>        | 61        |
|                                   | 6.4                                      | 5 mV s <sup>-1</sup>      | 1 M H <sub>2</sub> SO <sub>4</sub>     | 62        |
| CPNMA-1000                        | 301.8                                    | 10 mVs <sup>-1</sup>      | 2 M KOH                                | This work |
|                                   | 332.4                                    | 2 Ag <sup>-1</sup>        |                                        |           |
| CPNMA-900                         | 176.2                                    | 10 mVs <sup>-1</sup>      | 2 M KOH                                | This work |
|                                   | 130                                      | 2 Ag <sup>-1</sup>        |                                        |           |
| CPNMA-800                         | 54.9                                     | 10 mVs <sup>-1</sup>      | 2 M KOH                                | This work |
|                                   | 20.8                                     | 2 Ag <sup>-1</sup>        |                                        |           |

7. SEM images of PNMA and CPNMA-1000

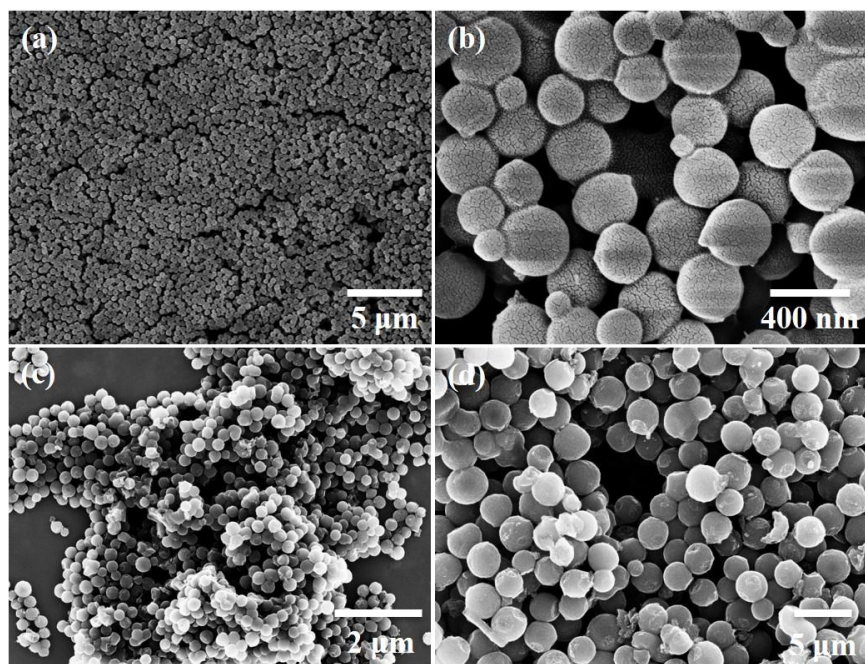

**Figure S1:** FESEM images of PNMA (a, b) and CPNMA-1000 (c, d)

8. The SEM images of CPNMA-900 and CPNMA-800

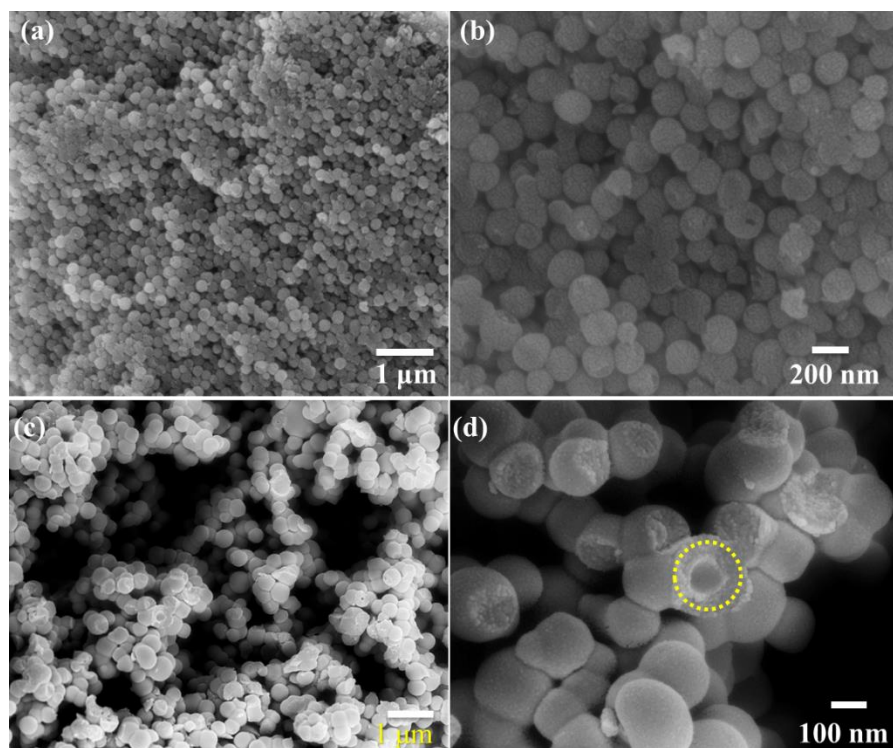

**Figure S2:** SEM images of CPNMA-900 and CPNMA-800 samples

9. Nitrogen adsorption-desorption plot

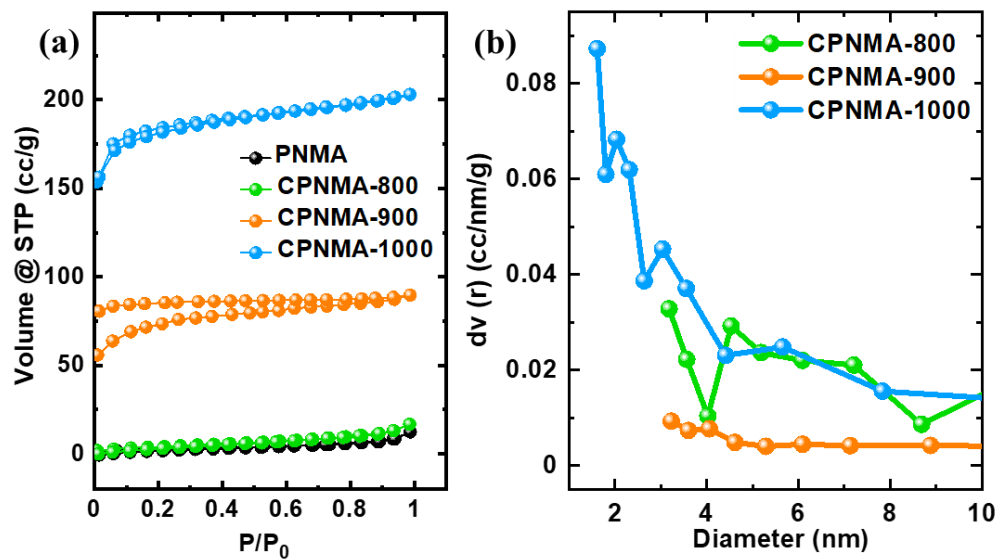

**Figure S3:** Nitrogen adsorption-desorption isotherm (a) and pore diameter distribution (b) of CPNMA carbons

10. XPS survey plot

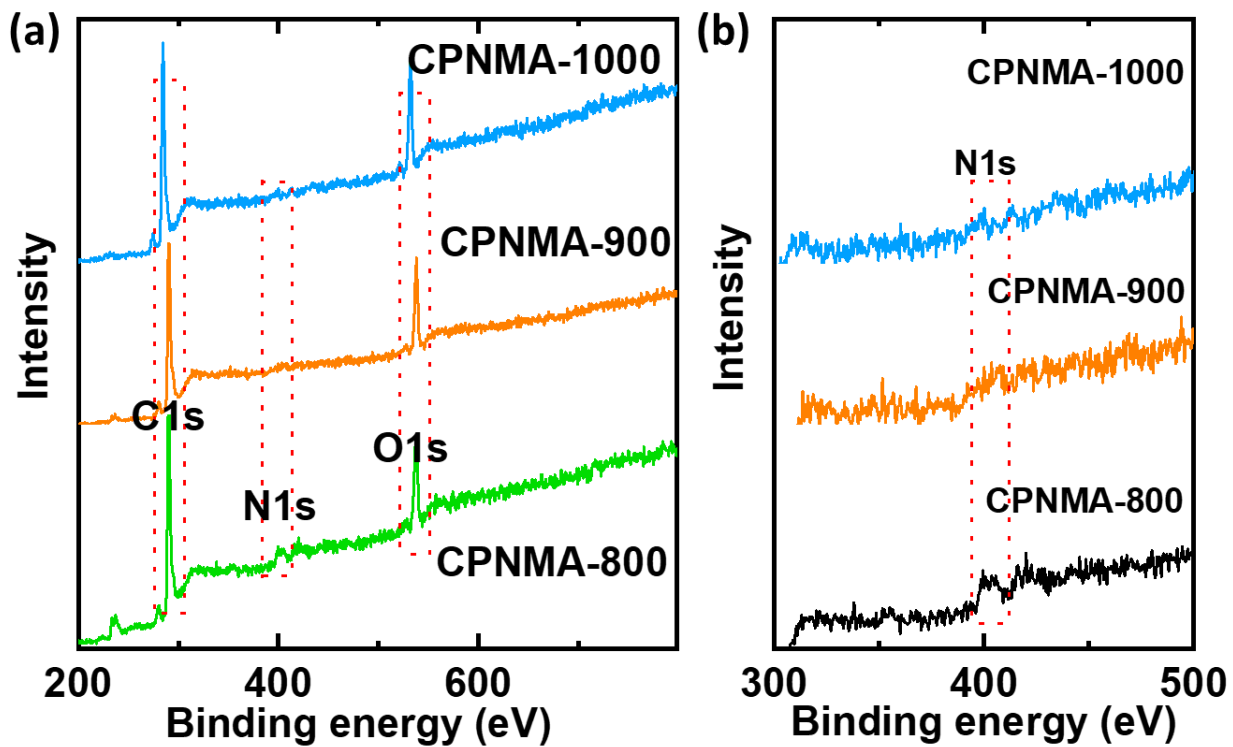

Figure S4: XPS survey plot of CPNMA samples

11. Percentage of graphitic nitrogen vs carbonization temperature plot

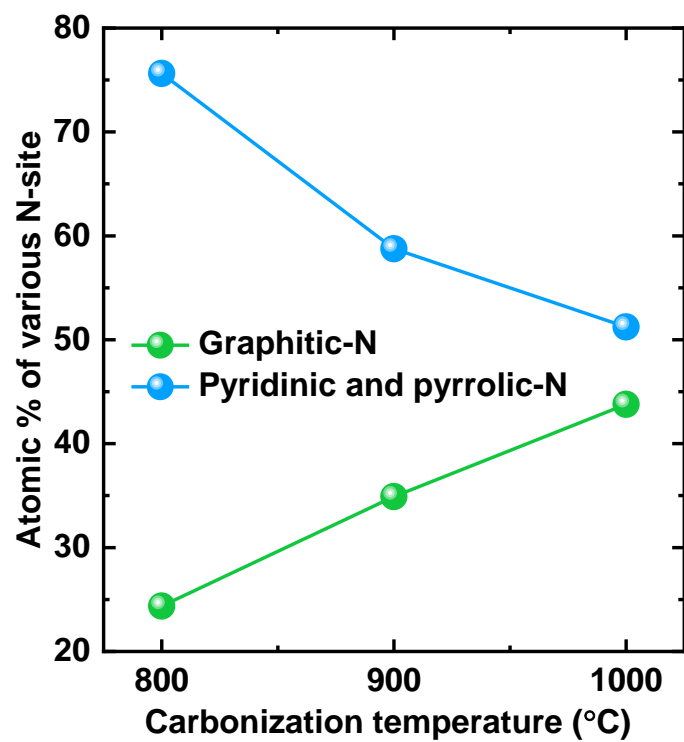

Figure S5: Atomic % of various nitrogen species vs carbonization temperature plot

## 12. Deconvolution plot of O1s XPS spectra

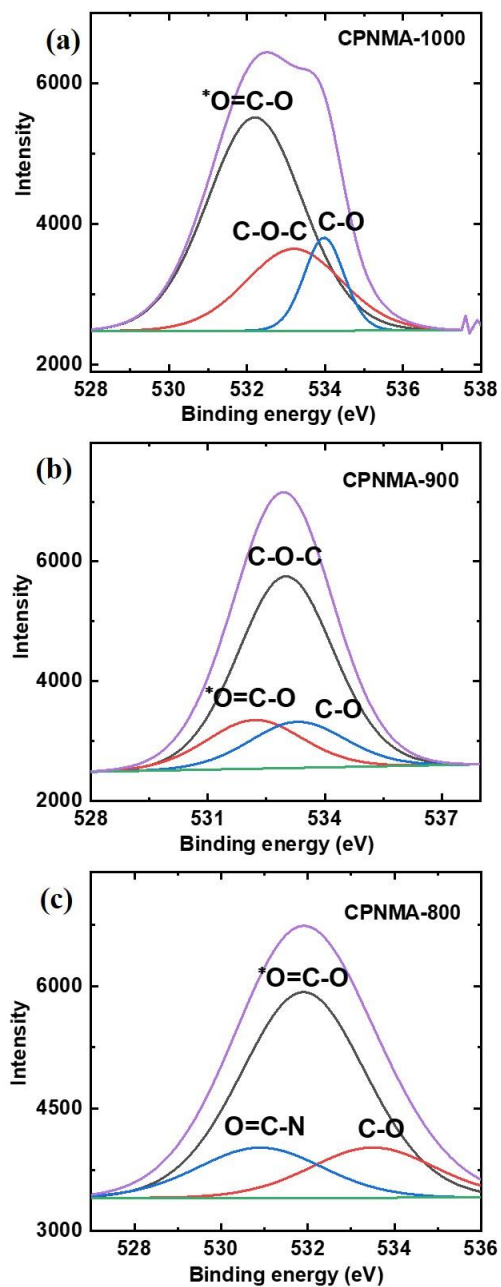

**Figure S6:** Deconvolution of high resolution O1s XPS spectra of (a) CPNMA-1000, (b) CPNMA-900) and (c) CPNMA-800 respectively

### 13. LSV and K-L plot

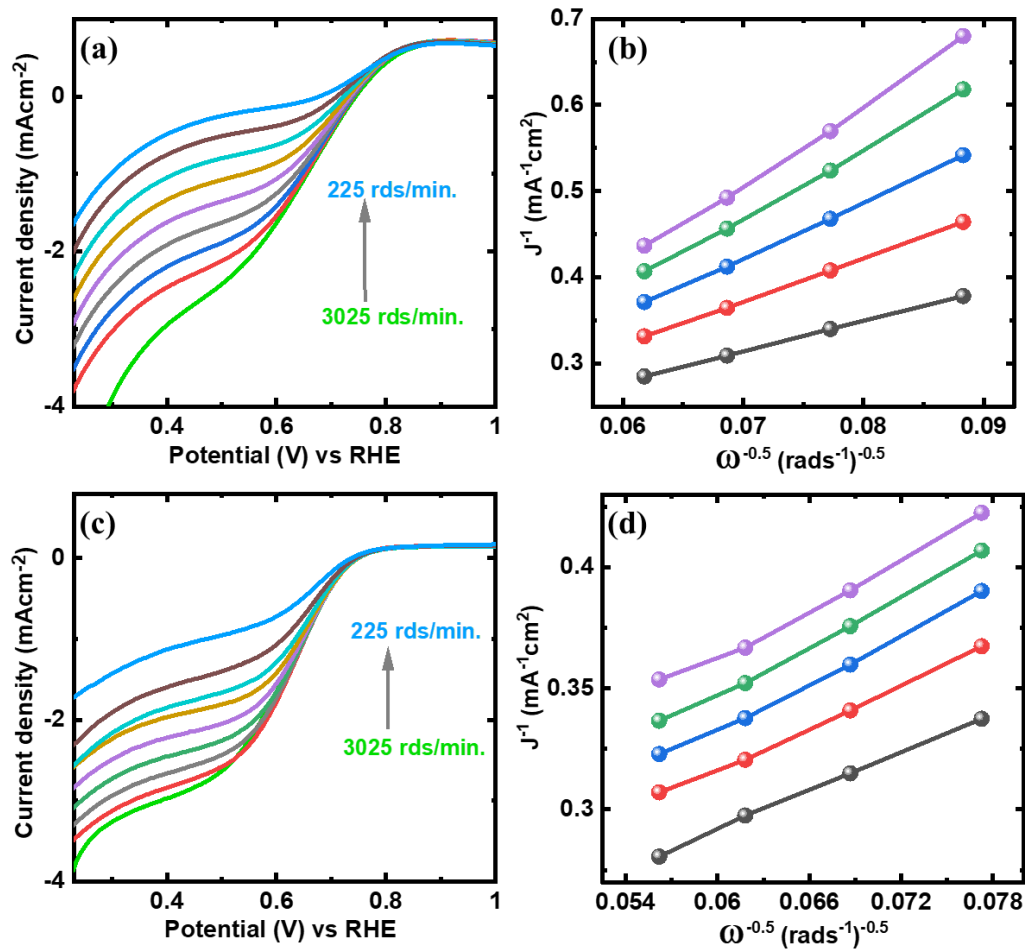

**Figure S7:** (a, c) LSV plot and (b, d) corresponding K-L plot of CPNMA-900 and CPNMA-800 respectively



## 14. References:

1. Y. Lv, L. Yang and D. Cao, Nitrogen and Fluorine-codoped Porous carbons as efficient metal-free electrocatalysts for oxygen reduction reaction in fuel cells, *ACS Appl. Mater. Interfaces*, 2017, **9**, 32859–32867.
2. J. Zhu, Y. Xu, Y. Zhang, T. Feng, J. Wang, S. Mao and L. Xiong, Porous and high electronic conductivity nitrogen-doped nanosheet carbon derived from polypyrrole for high-power supercapacitors, *Carbon*, 2016, **107**, 638-645.
3. G. Xu, B. Ding, P. Nie, L. Shen, J. Wang and X. Zhang, Porous nitrogen-doped carbon nanotubes derived from tubular polypyrrole for energy-storage applications, *Chem. Eur. J.*, 2013, **19**, 12306 – 12312.
4. J. Han, G. Xu, B. Ding, J. Pan, H. Dou and D. R. M. Farlane, Porous nitrogen-doped hollow carbon spheres derived from polyaniline for high performance supercapacitor, *J. Mater. Chem. A*, 2014, **2**, 5352–5357.
5. T. Zhu, J. Zhou, Z. Li, S. Li, W. Si and S. Zhuo, Hierarchical porous and N-doped carbon nanotubes derived from polyaniline for electrode materials in supercapacitors, *J. Mater. Chem. A*, 2014, **2**, 12545–12551.
6. R. Silva, D. Voiry, M. Chhowalla and T. Asefa, Efficient metal-free electrocatalysts for oxygen reduction: polyaniline-derived N- and O-doped mesoporous Carbons, *J. Am. Chem. Soc.*, 2013, **135**, 7823–7826.
7. M. Sevilla, L. Yu, T. P. Feller, A. B. Fuertes and M.-M. Titirici, Polypyrrole-derived mesoporous nitrogen-doped carbons with intrinsic catalytic activity in the oxygen reduction reaction, *RSC Adv.*, 2013, **3**, 9904–9910.
8. J. Guo, J. Liu, H. Dai, R. Zhou, T. Wang, C. Zhang, S. Ding and H.-G. Wang, Nitrogen doped carbon nanofiber derived from polypyrrole functionalized polyacrylonitrile for applications in lithium-ion batteries and oxygen reduction reaction, *J. Colloid Interface Sci.*, 2017, **507**, 154–161.
9. Y. Zhang, X. Zhuang, Y. Su, F. Zhang and X. Feng, Polyaniline nanosheet derived B/N co-doped carbon nanosheets as efficient metal-free catalysts for oxygen reduction reaction, *J. Mater. Chem. A*, 2014, **2**, 7742–7746.
10. N. Gavrilov, I. A. Pasti, M. Mitric, J. T.-Sejdi, G. C.-Marjanovic and S. V. Mentus, Electrocatalysis of oxygen reduction reaction on polyaniline-derived nitrogen-doped carbon nanoparticle surfaces in alkaline media, *J. Power Sources*, 2012, **220**, 306-316.

11. F. Zhou, G. Wang, F. Huang, Y. Zhang and M. Pan, Polyaniline derived N- and O-enriched high surface area hierarchical porous carbons as an efficient metal-free electrocatalyst for oxygen reduction, *Electrochim. Acta*, 2017, **257**, 73–81.
12. D. Zhu, Y. Wang, L. Gan, M. Liu, K. Cheng, Y. Zhao, X. Deng and D. Sun, Nitrogen-containing carbon microspheres for supercapacitor electrodes, *Electrochim. Acta*, 2015, **158**, 166–174.
13. S. Xing, L. Chen, L. Huang, T. Wang, X. Yu, Y. Zhang and Y. Xing, One-step synthesis of hollow nanostructured aniline oligomers and their derived nitrogen doped carbon, *Synthetic Metals*, 2017, **227**, 170–176.
14. W. Liu, Q. Ru, S. Zuo, S. Yang, J. Han and C. Yao, Controllable synthesis of nitrogen-doped carbon nanotubes derived from halloysite-templated polyaniline towards nonprecious ORR catalysts, *Appl. Surf. Sci.*, 2019, **469**, 269–275.
15. N. Deka, J. Barman, J. Deka, K. Raidongia and G. K. Dutta, Microporous organic polymer-derived nitrogen-doped porous carbon spheres for efficient capacitive energy storage, *Chem. Electro. Chem.*, 2019, **6**, 3327–3336.
16. S. Guo, P. Yuan, J. Zhang, P. Jin, H. Sun, K. Lei, X. Pang, Q. Xu and F. Cheng, Atomic-scaled cobalt encapsulated in P, N-doped carbon sheaths over carbon nanotubes for enhanced oxygen reduction electrocatalysis under acidic and alkaline media, *Chem. Commun.*, 2017, **53**, 9862–9865.
17. I. M. Patil, M. Lokanathan and B. Kakade, Three-dimensional nanocomposite of reduced graphene oxide and hexagonal boron nitride as an efficient metal-free catalyst for oxygen electroreduction, *J. Mater. Chem. A*, 2016, **4**, 4506–4515.
18. W. Liu, Q. Ru, S. Zuo, S. Y. Jie, Han and C. Yao, Controllable synthesis of nitrogen-doped carbon nanotubes derived from halloysite-templated polyaniline towards nonprecious ORR catalysts, *Appl. Surf. Sci.*, 2019, **469**, 269–275.
19. Y. Meng, D. Voiry, A. Goswami, X. Zou, X. Huang, M. Chhowalla, Z. Liu, and T. Asefa, N-, O-, and S-tridoped nanoporous carbons as selective catalysts for oxygen reduction and alcohol oxidation reactions, *J. Am. Chem. Soc.*, 2014, **136**, 39, 13554–13557.
20. R. Silva, D. Voiry, M. Chhowalla and T. Asefa, Efficient metal-free electrocatalysts for oxygen reduction: polyaniline-derived N- and O-doped mesoporous Carbons, *J. Am. Chem. Soc.*, 2013, **135**, 21, 7823–7826.
